# Supplementary material for: Describing Chemical Reactivity with Frontier Molecular Orbitalets
Source: PubMed Central journal article supplement — JACS Au. 2022 Jun 16;2(6):1383–94. doi: 10.1021/jacsau.2c00085 (PMC9241161; doi:10.1021/jacsau.2c00085), 2022-06-16
Supplement: au2c00085_si_001.pdf [file au2c00085_si_001.pdf]

# Supporting Information for Describing Chemical Reactivity with Frontier Molecular Orbitalets

Jincheng Yu,<sup>†,‡,||</sup> Neil Qiang Su,<sup>¶,†,||</sup> and Weitao Yang<sup>\*,†,§</sup>

<sup>†</sup>*Department of Chemistry, Duke University, Durham, North Carolina 27708, USA*

<sup>‡</sup>*Taishan College, Shandong University, Jinan 250100, China*

<sup>¶</sup>*Department of Chemistry, Key Laboratory of Advanced Energy Materials Chemistry  
(Ministry of Education) and Renewable Energy Conversion and Storage Center  
(RECAST), Nankai University, Tianjin 300071, China*

<sup>§</sup>*Department of Physics, Duke University, Durham, North Carolina 27708, USA*

<sup>||</sup>*J. Y. and N. S. contributed equally to this work and share the first authorship*

E-mail: weitao.yang@duke.edu

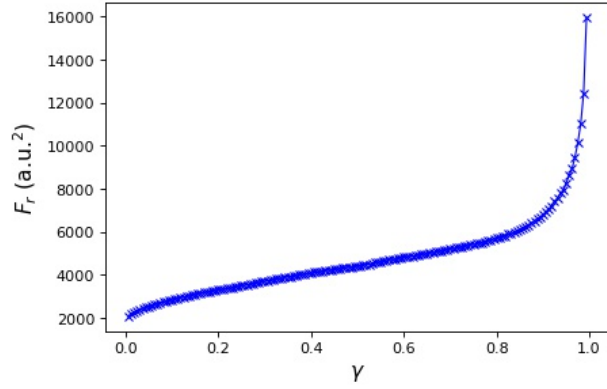

(a) Delocalization in physical space

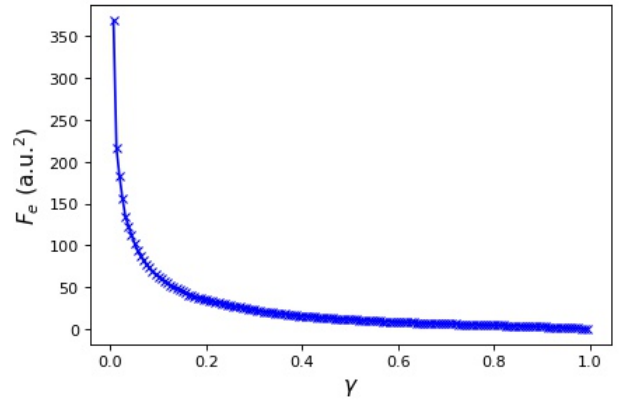

(b) Delocalization in energy space

Figure S1:  $F_r$  and  $F_e$  of hexadecaoctaene. (a)  $F_r$  is plotted as a function of  $\gamma$ , the value increases as  $\gamma$  increases. (b)  $F_e$  is plotted as a function of  $\gamma$ , the value decreases as  $\gamma$  increases.

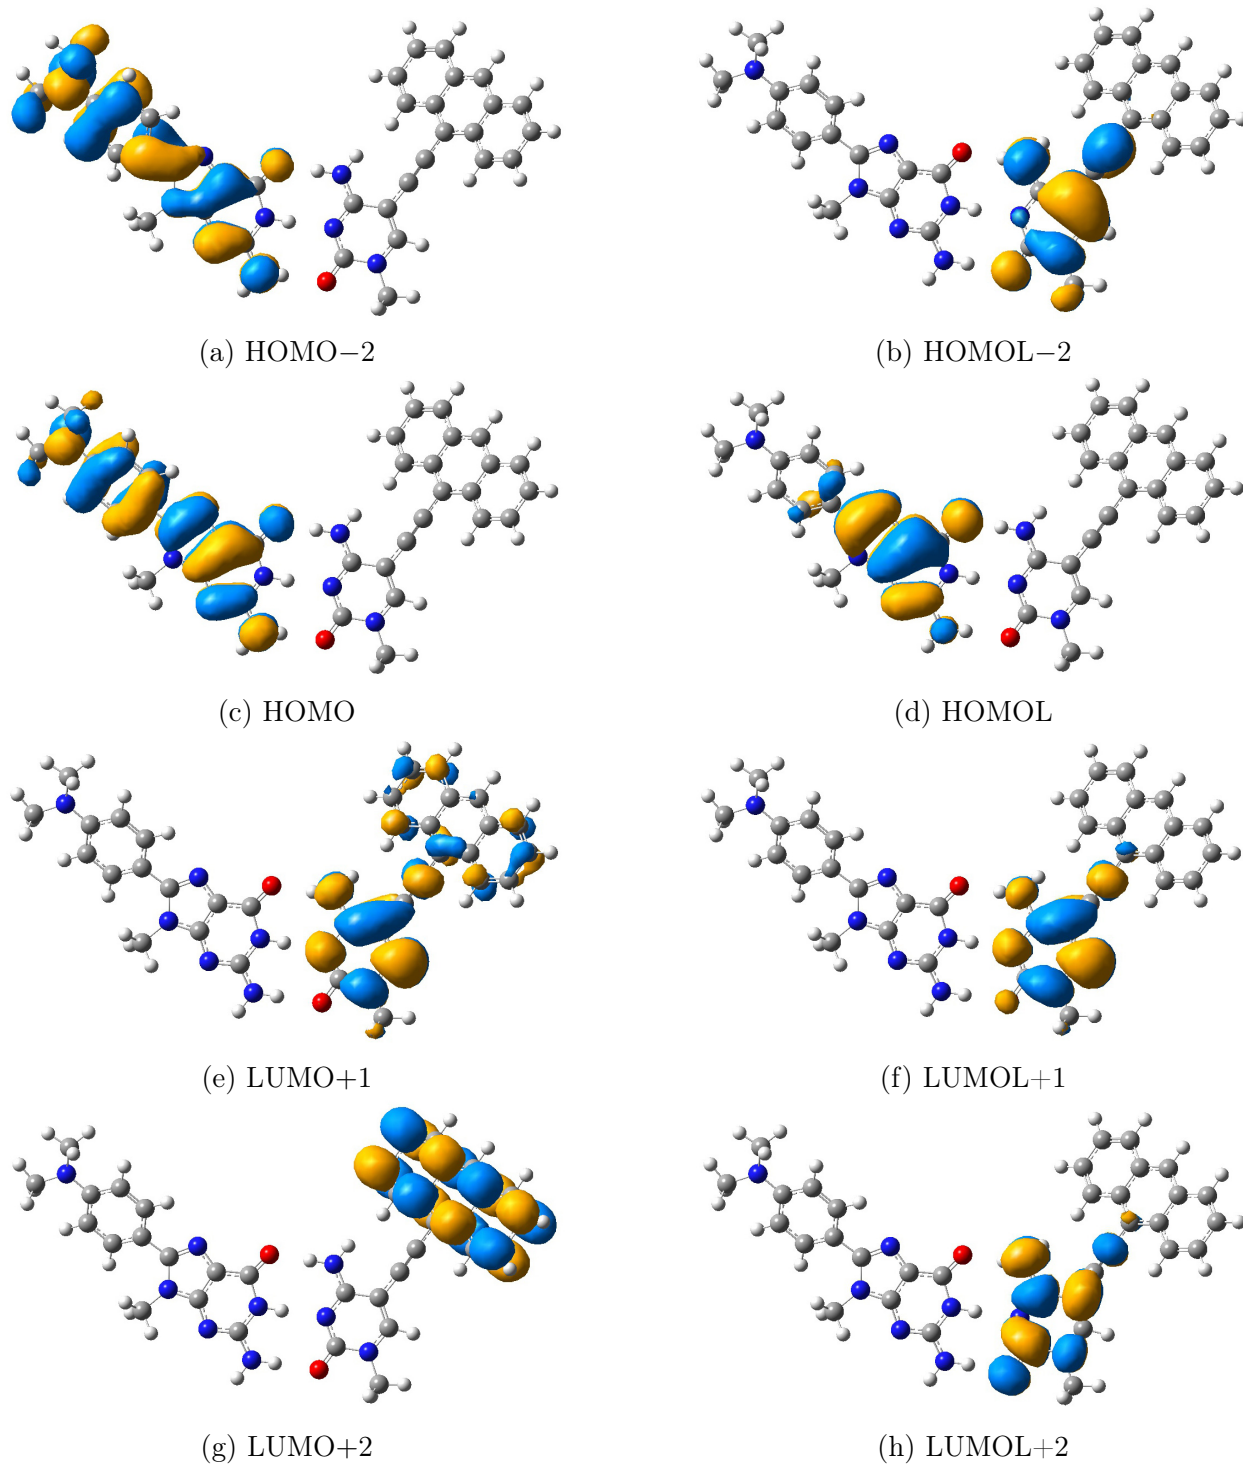

Figure S2: CMOs and orbitalets near FMO(L)s of the DBA CT system: (a) HOMO-2, (b) HOMOL-2, (c) HOMO, (d) HOMOL, (e) LUMO+1, (f) LUMOL+1, (g) LUMO+2, and (h) LUMOL+2. The excitation from HOMOL-1 to LUMOL can explain the CT process. Iso = 0.05.

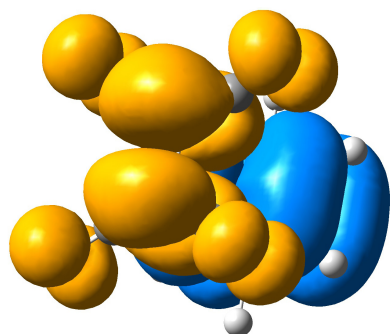

(a) TCNE-benzene

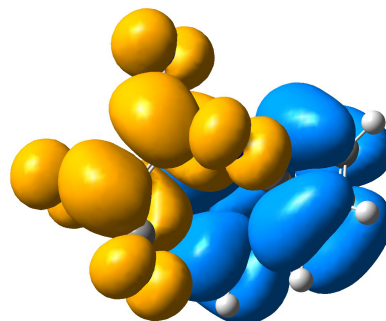

(b) TCNE-naphthalene

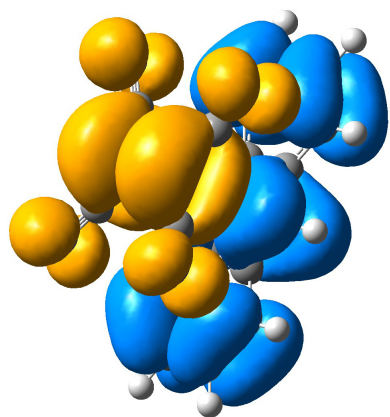

(c) TCNE-anthracene (V)

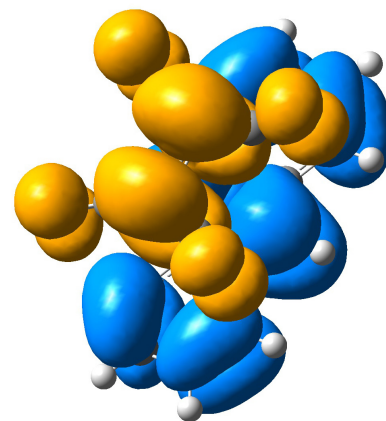

(d) TCNE-anthracene (P)

Figure S3: CIS results of the TCNE-aromatic molecule CT systems: (a) TCNE-benzene, (b) TCNE-naphthalene, (c) TCNE-anthracene in V configuration, and (d) TCNE-anthracene in P configuration. CIS calculations show the same CT character as FMOLs do. Iso = 0.02.

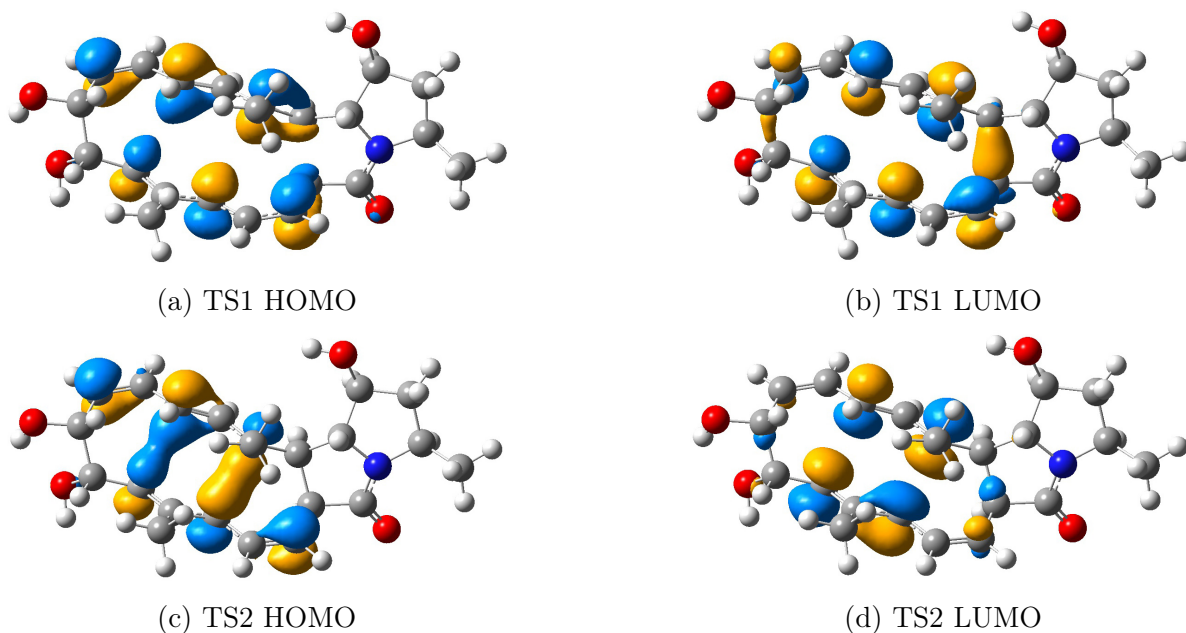

Figure S4: FMOs for TS1 and TS2 of the bifurcating reaction shown in Figure 14: (a) HOMO of TS1, (b) LUMO of TS1, (c) HOMO of TS2, and (d) LUMO of TS2. FMOs cannot clearly explain the bifurcating character of the reaction. Iso = 0.02.

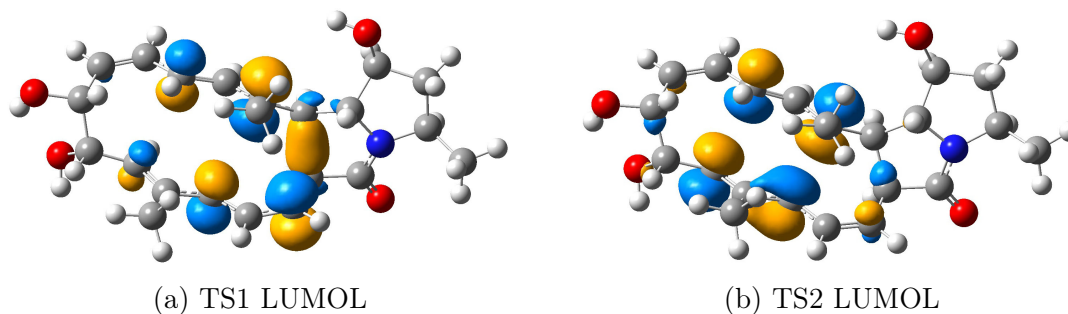

Figure S5: LUMOLs for TS1 and TS2 of the bifurcating reaction shown in Figure 14: (a) LUMOL of TS1, (b) LUMOL of TS2. The LUMOLs are mainly localized to the region where the chemical interaction happens.

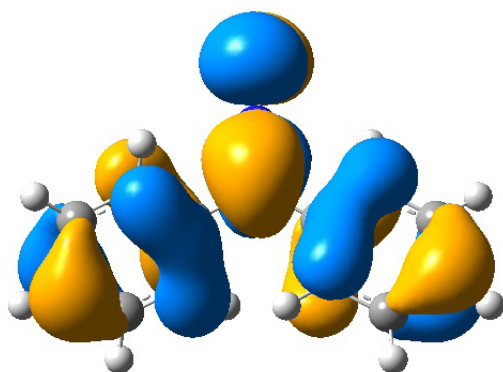

(a) HOMO

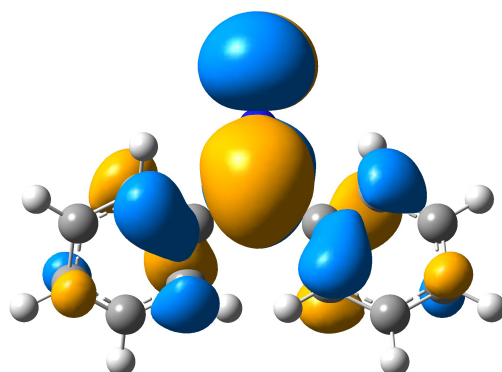

(b) LUMO

Figure S6: (a) HOMO and (b) HOMOL of diphenyldiazomethane at  $\text{Iso} = 0.02$ . Compared to Figure 12 in the main text, using a smaller Iso value can cause each segment of the orbital or orbitalet to be larger, but the overall orbital(et) shapes remain similar.
